# Supplementary material for: Abnormal expression of SLIT3 induces intravillous vascularization dysplasia in ectopic pregnancy
Source: PeerJ. 2023 Feb 10;11:e14850. doi: 10.7717/peerj.14850 (PMC9924138; doi:10.7717/peerj.14850)
Supplement: Supplemental Information 6 [file peerj-11-14850-s006.xlsx]

## Sheet: Sheet1
Table S1. Baseline characteristics of the two groups
Variables	NP (n = 44)			EP (n = 41)			p value
Age a (year)	32.02± 5.78			32.59 ± 4.73			0.12
BMI a (kg/m2)	21.22 ± 2.00			21.46 ± 1.93			0.57
Gestational age a (day)	47.93 ± 4.92			46.10 ± 4.27			0.69
Gravidity b	2.00 (0.00, 2.00)			2.00 (1.00, 3.00)			0.58
Parity b	1.00 (0.00, 1.00)			0.00 (0.00, 1.00)			0.26
HCGb (IU/L)	22009.00 (14401.50, 36232.25)			3357.00 (1687.00, 7160.00)			＜0.0001
BMI: Body Max Iindex; HCG: . Human chorionic gonadotropin
a Data shown as mean ± SD.
b Data shown as medium ( interquartile range, IQR)
