# Supplementary material for: Abnormal expression of SLIT3 induces intravillous vascularization dysplasia in ectopic pregnancy
Source: PeerJ. 2023 Feb 10;11:e14850. doi: 10.7717/peerj.14850 (PMC9924138; doi:10.7717/peerj.14850)
Supplement: Supplemental Information 7 [file peerj-11-14850-s007.xlsx]

## Sheet: Sheet1
Table S2. Primers for miRNAs
Gene name	RT primer	Forword primer	Reverse primer
hsa-miR-34c-5p	GTCGTATCCAGTGCAGGGTCCGAGGTATTCGCACTGGATACGACGCAATC	CGCGAGGCAGTGTAGTTAGCT	AGTGCAGGGTCCGAGGTATT
hsa-miR-34a-5p	GTCGTATCCAGTGCAGGGTCCGAGGTATTCGCACTGGATACGACACAACC	CGCGTGGCAGTGTCTTAGCT	AGTGCAGGGTCCGAGGTATT
hsa-miR-491-5p	GTCGTATCCAGTGCAGGGTCCGAGGTATTCGCACTGGATACGACCCTCAT	CGAGTGGGGAACCCTTCC	AGTGCAGGGTCCGAGGTATT
Novel_ 829	GTCGTATCCAGTGCAGGGTCCGAGGTATTCGCACTGGATACGACAGGCAT	CGCGTTCCCTTTGTCATCCT	CGCGTTCCCTTTGTCATCCT
