# Supplementary material for: Abnormal expression of SLIT3 induces intravillous vascularization dysplasia in ectopic pregnancy
Source: PeerJ. 2023 Feb 10;11:e14850. doi: 10.7717/peerj.14850 (PMC9924138; doi:10.7717/peerj.14850)
Supplement: Supplemental Information 9 [file peerj-11-14850-s009.xlsx]

## Sheet: Sheet1
Table S4. Detective results of CNVs and contamination in ten samples
Samples	Sex	CNVs	Maternal comtainment	DNA quality
NP01	female	46, XX	normal	A
NP02	male	46, XY	normal	A
NP03	male	46, XY	normal	A
NP04	male	46, XY	normal	A
NP05	male	46, XY	normal	A
EP01	male	46, XY	normal	A
EP02	male	46, XY	normal	A
EP03	female	46, XX	normal	A
EP04	male	46, XY	normal	A
EP05	male	46, XY	normal	A
