# Supplementary material for: Abnormal expression of SLIT3 induces intravillous vascularization dysplasia in ectopic pregnancy
Source: PeerJ. 2023 Feb 10;11:e14850. doi: 10.7717/peerj.14850 (PMC9924138; doi:10.7717/peerj.14850)
Supplement: Supplemental Information 11 [file peerj-11-14850-s011.xlsx]

## Sheet: DEGs
Table S6. The differntially expressed genes between the EP and NP (FDR<0.05 and |log2(FoldChange)|≥1)
Gene_id	Symbol	readcount EP	readcount NP	Log2FC	pvalue	FDR
ENSG00000074410	CA12	3654.4	652.6	2.41979	3.55298e-21	6.03296e-17
ENSG00000087245	MMP2	37400.4	11526.6	1.6128	3.76597e-20	3.19731e-16
ENSG00000172901	LVRN	2354	505.4	2.13844	2.51013e-16	1.42074e-12
ENSG00000196839	ADA	480.8	98	2.20123	7.35105e-15	2.08035e-11
ENSG00000050628	PTGER3	92.4	15.6	2.46871	2.6675e-14	6.18563e-11
ENSG00000140479	PCSK6	1723.8	707.2	1.21003	2.91432e-14	6.18563e-11
ENSG00000135074	ADAM19	10162.8	3637	1.39726	1.29071e-13	2.43515e-10
ENSG00000170525	PFKFB3	624.2	178.6	1.70811	3.91536e-13	6.64829e-10
ENSG00000169836	TACR3	158.4	17.6	3.07504	8.79616e-13	1.35781e-09
ENSG00000165949	IFI27	1307	193.6	2.66568	2.19089e-12	3.10011e-09
ENSG00000162434	JAK1	2197.6	975.6	1.08419	2.46416e-12	3.21857e-09
ENSG00000064547	LPAR2	212.8	58.6	1.77875	4.68087e-12	5.29875e-09
ENSG00000121690	DEPDC7	606.2	155.2	1.92622	6.57301e-12	6.97561e-09
ENSG00000167618	LAIR2	15490.4	4064	1.88976	7.54239e-12	7.53352e-09
ENSG00000079156	OSBPL6	86.6	20.6	1.99633	1.13442e-11	1.07014e-08
ENSG00000034510	TMSB10	13293.6	6268	1.01068	1.25195e-11	1.11885e-08
ENSG00000166920	C15orf48	257.2	43.2	2.46379	1.47185e-11	1.2496e-08
ENSG00000017797	RALBP1	4408	1970.2	1.08506	2.09566e-11	1.69449e-08
ENSG00000089639	GMIP	449	139.6	1.60442	4.81058e-11	3.67361e-08
ENSG00000124216	SNAI1	639.2	274	1.14421	4.97603e-11	3.67361e-08
ENSG00000213889	PPM1N	358.4	75.6	2.20333	1.25115e-10	8.85186e-08
ENSG00000183018	SPNS2	839.8	134.8	2.55026	2.50003e-10	1.69802e-07
ENSG00000176148	TCP11L1	359	144.4	1.24471	2.7822e-10	1.81699e-07
ENSG00000142623	PADI1	2100.6	575.2	1.7905	2.95469e-10	1.83292e-07
ENSG00000186715	MST1L	221.6	50.4	2.06654	4.85893e-10	2.66144e-07
ENSG00000139053	PDE6H	113.6	16.2	2.72871	5.63898e-10	2.90151e-07
ENSG00000185269	NOTUM	22093.2	6932	1.60836	6.14071e-10	2.99781e-07
ENSG00000168209	DDIT4	475.2	100.4	2.13326	6.17924e-10	2.99781e-07
ENSG00000173157	ADAMTS20	4254.2	828.2	2.29952	1.08939e-09	5.13828e-07
ENSG00000141524	TMC6	743	338.2	1.04603	1.14968e-09	5.27611e-07
ENSG00000187608	ISG15	1340.4	312.2	2.05462	1.25028e-09	5.58677e-07
ENSG00000100593	ISM2	17076	6409	1.33849	1.3509e-09	5.88161e-07
ENSG00000160200	CBS	135.8	57.2	1.16596	1.51352e-09	6.42488e-07
ENSG00000105707	HPN	94.8	15.4	2.54815	1.80837e-09	7.48928e-07
ENSG00000171492	LRRC8D	298.2	137.8	1.03258	2.41411e-09	9.7599e-07
ENSG00000100300	TSPO	910.4	363.6	1.25294	2.57808e-09	1.01136e-06
ENSG00000154217	PITPNC1	178.8	77.4	1.11978	2.96116e-09	1.11735e-06
ENSG00000115556	PLCD4	397.6	128.6	1.55802	3.21346e-09	1.16095e-06
ENSG00000163823	CCR1	996.4	312.8	1.61811	3.64106e-09	1.21283e-06
ENSG00000100979	PLTP	2888.4	1282.4	1.06711	3.64278e-09	1.21283e-06
ENSG00000142798	HSPG2	22587.4	8957.4	1.26723	3.79359e-09	1.21538e-06
ENSG00000116014	KISS1R	303.6	68.2	2.05351	3.982e-09	1.23114e-06
ENSG00000156966	B3GNT7	1509.6	522	1.47377	3.98779e-09	1.23114e-06
ENSG00000105894	PTN	1763.6	731.6	1.20252	4.53656e-09	1.3734e-06
ENSG00000071073	MGAT4A	1771.6	682.4	1.3005	5.97916e-09	1.75045e-06
ENSG00000182575	NXPH3	142.6	32.6	2.05421	7.44041e-09	2.14133e-06
ENSG00000142182	DNMT3L	29.6	0	7.19257	8.55573e-09	2.42127e-06
ENSG00000169242	EFNA1	3819.8	1536.6	1.23773	9.00825e-09	2.50754e-06
ENSG00000112183	RBM24	184.2	46.6	1.93181	1.13153e-08	3.04974e-06
ENSG00000006453	BAIAP2L1	990.4	464	1.02205	1.78306e-08	4.45241e-06
ENSG00000137267	TUBB2A	274.2	104.8	1.29701	2.02944e-08	4.99418e-06
ENSG00000102996	MMP15	18031.6	8341.2	1.03502	2.08681e-08	4.99511e-06
ENSG00000184163	C1QTNF12	53.6	11	2.21255	2.08865e-08	4.99511e-06
ENSG00000174358	SLC6A19	679.4	193.6	1.77041	2.25258e-08	5.31233e-06
ENSG00000140416	TPM1	8669.6	3866.6	1.09447	2.58226e-08	5.81399e-06
ENSG00000145990	GFOD1	363.6	154.6	1.16181	2.60226e-08	5.81399e-06
ENSG00000074527	NTN4	204	44.8	2.08431	3.64786e-08	8.04424e-06
ENSG00000280798	LINC00294	163.6	70.8	1.13305	4.92551e-08	1.01994e-05
ENSG00000179761	PIPOX	424.8	98	2.06037	5.45294e-08	1.10996e-05
ENSG00000164076	CAMKV	46.2	2.8	3.97225	5.76944e-08	1.15253e-05
ENSG00000189159	JPT1	1959.2	867.4	1.10893	6.21506e-08	1.22711e-05
ENSG00000214617	SLC6A10P	92.6	25	1.8102	8.44263e-08	1.62102e-05
ENSG00000143537	ADAM15	1975.4	918.6	1.03618	8.49649e-08	1.62102e-05
ENSG00000102743	SLC25A15	929.8	376	1.24318	9.31128e-08	1.7181e-05
ENSG00000184060	ADAP2	618.2	266.8	1.14111	9.40684e-08	1.7181e-05
ENSG00000105643	ARRDC2	118	45.4	1.28842	9.4101e-08	1.7181e-05
ENSG00000125454	SLC25A19	235	99.2	1.16963	1.2052e-07	2.06425e-05
ENSG00000078900	TP73	26.8	4	2.64106	1.38645e-07	2.24209e-05
ENSG00000182472	CAPN12	103.6	27.6	1.80477	1.44522e-07	2.31508e-05
ENSG00000170345	FOS	2019.4	519.4	1.84392	1.54175e-07	2.44662e-05
ENSG00000124126	PREX1	843.4	368.2	1.08568	1.61684e-07	2.5391e-05
ENSG00000169884	WNT10B	218.2	75.4	1.43455	1.73763e-07	2.68227e-05
ENSG00000128203	ASPHD2	160.2	50.8	1.58113	1.91388e-07	2.84902e-05
ENSG00000125753	VASP	3283.8	1506.4	1.05699	1.92955e-07	2.84902e-05
ENSG00000183671	GPR1	437.4	136.6	1.63662	1.94853e-07	2.85225e-05
ENSG00000101210	EEF1A2	59	5.8	3.25772	2.05832e-07	2.96189e-05
ENSG00000070190	DAPP1	264.4	65.8	1.92516	2.12499e-07	3.03212e-05
ENSG00000134323	MYCN	3833.4	1356.4	1.4195	2.40256e-07	3.39962e-05
ENSG00000159307	SCUBE1	1628.6	543.4	1.53839	2.51488e-07	3.49838e-05
ENSG00000088280	ASAP3	2173.4	942.4	1.14765	2.64768e-07	3.62561e-05
ENSG00000076706	MCAM	6205.2	2381.6	1.32424	2.6822e-07	3.6435e-05
ENSG00000122417	ODF2L	330.2	149.6	1.0721	3.03081e-07	4.02056e-05
ENSG00000187984	ANKRD19P	59.2	12	2.22725	3.89913e-07	5.0157e-05
ENSG00000131979	GCH1	585.4	224.6	1.34002	4.03646e-07	5.15331e-05
ENSG00000124766	SOX4	1588.2	663.6	1.19863	4.79528e-07	6.0314e-05
ENSG00000143369	ECM1	1564.2	708	1.08809	4.99074e-07	6.23108e-05
ENSG00000166710	B2M	21787.4	7953.8	1.3581	5.667e-07	6.95019e-05
ENSG00000161638	ITGA5	19004.4	8351.4	1.10415	5.6895e-07	6.95019e-05
ENSG00000197147	LRRC8B	433.6	201.2	1.04534	5.77547e-07	7.00482e-05
ENSG00000105472	CLEC11A	677	213.6	1.56645	5.91575e-07	7.12407e-05
ENSG00000173706	HEG1	3803	1424.4	1.35971	6.30486e-07	7.51341e-05
ENSG00000129951	PLPPR3	32.4	8.4	1.86344	6.52102e-07	7.68937e-05
ENSG00000235162	C12orf75	1138.8	533	1.03747	6.75237e-07	7.90725e-05
ENSG00000127418	FGFRL1	982.4	450.6	1.06761	8.28924e-07	9.51022e-05
ENSG00000203697	CAPN8	68.4	11.2	2.47739	8.42711e-07	9.60351e-05
ENSG00000139278	GLIPR1	1295.6	419.6	1.58778	9.16043e-07	0.000102539
ENSG00000092969	TGFB2	290.2	108.6	1.33968	9.36018e-07	0.000102539
ENSG00000135248	FAM71F1	52	17.4	1.47649	9.99078e-07	0.000108746
ENSG00000206561	COLQ	48.6	17.6	1.37335	1.10721e-06	0.0001193
ENSG00000213949	ITGA1	3536.8	1655.8	1.00941	1.1101e-06	0.0001193
ENSG00000028137	TNFRSF1B	4981.4	2236.6	1.03481	1.14172e-06	0.00012178
ENSG00000114631	PODXL2	67.8	27.4	1.22189	1.14751e-06	0.00012178
ENSG00000164438	TLX3	54	17.8	1.53604	1.24343e-06	0.00013033
ENSG00000196739	COL27A1	6506.6	2473.2	1.30811	1.43038e-06	0.000144571
ENSG00000145287	PLAC8	735.6	285.4	1.30659	1.50073e-06	0.000149571
ENSG00000188157	AGRN	1001.4	461.8	1.01012	1.51509e-06	0.000149571
ENSG00000143590	EFNA3	26.8	6	2.07659	1.57511e-06	0.000153709
ENSG00000151651	ADAM8	1786.2	674.8	1.35299	1.61489e-06	0.000155201
ENSG00000100292	HMOX1	2334.6	1068.6	1.02879	1.67686e-06	0.00015731
ENSG00000007171	NOS2	1324.6	330.6	1.96677	1.73559e-06	0.000161191
ENSG00000162390	ACOT11	168.4	52.2	1.56489	1.80757e-06	0.000166807
ENSG00000124701	APOBEC2	123.6	24.2	2.25758	1.87931e-06	0.00017249
ENSG00000160801	PTH1R	1162.6	391	1.46608	2.05435e-06	0.000184565
ENSG00000124429	POF1B	96	22.4	2.00804	2.18627e-06	0.000192347
ENSG00000204632	HLA-G	7642.8	2225.2	1.74999	2.20765e-06	0.00019265
ENSG00000169429	CXCL8	255	5.6	5.33919	2.42765e-06	0.000208189
ENSG00000164120	HPGD	5719.8	1959.4	1.49358	2.6936e-06	0.000229835
ENSG00000183734	ASCL2	1462.8	599.6	1.2343	2.79753e-06	0.00023751
ENSG00000178038	ALS2CL	531.8	196.6	1.32693	2.90635e-06	0.000245199
ENSG00000204363	SPANXN5	17.2	2	3.00996	3.03022e-06	0.000253464
ENSG00000130589	HELZ2	1028	390.4	1.31755	3.21246e-06	0.000264794
ENSG00000120899	PTK2B	1235	520.4	1.18625	3.25606e-06	0.000267091
ENSG00000133106	EPSTI1	486.8	197	1.24475	3.30307e-06	0.000269645
ENSG00000206113	CFAP99	51.8	5.8	3.11022	3.44409e-06	0.000279812
ENSG00000173110	HSPA6	316.2	7.4	5.24961	3.58932e-06	0.000290222
ENSG00000186510	CLCNKA	109.4	36.4	1.5278	3.90417e-06	0.00030978
ENSG00000156299	TIAM1	977.6	469.2	1.00373	4.10033e-06	0.000320846
ENSG00000126878	AIF1L	4650.6	2069.4	1.10965	4.53155e-06	0.000346602
ENSG00000185885	IFITM1	246.8	61.2	1.9215	4.70743e-06	0.00035844
ENSG00000268864	LOC284379	80.4	26.4	1.5068	4.7514e-06	0.000360173
ENSG00000145113	MUC4	403.4	139.8	1.4904	4.79478e-06	0.000361846
ENSG00000042493	CAPG	1004	400.4	1.25042	4.94998e-06	0.000370267
ENSG00000175592	FOSL1	49.8	13.6	1.81624	5.49057e-06	0.000400128
ENSG00000165449	SLC16A9	294	74.6	1.94023	5.93363e-06	0.000427975
ENSG00000171451	DSEL	652.4	206.6	1.57869	5.9483e-06	0.000427975
ENSG00000223850	MYCNUT	1015.6	348	1.4537	7.21548e-06	0.000502127
ENSG00000112769	LAMA4	1824.8	702.4	1.31979	7.56113e-06	0.000521903
ENSG00000105290	APLP1	109.6	25.2	2.099	7.79858e-06	0.000533951
ENSG00000169548	ZNF280A	67.8	11.6	2.4756	7.84347e-06	0.000534868
ENSG00000188338	SLC38A3	347.6	43.6	2.89681	8.14711e-06	0.000549451
ENSG00000013588	GPRC5A	189.4	53	1.7071	8.5897e-06	0.000569739
ENSG00000084731	KIF3C	234.2	104.4	1.09196	9.84054e-06	0.000639312
ENSG00000160293	VAV2	1018.8	469	1.06273	9.88233e-06	0.000639312
ENSG00000104450	SPAG1	88.6	39.4	1.09565	9.90219e-06	0.000639312
ENSG00000237330	RNF223	120.2	35.2	1.67118	1.0225e-05	0.000652706
ENSG00000169692	AGPAT2	347.2	161.8	1.01065	1.02648e-05	0.000652795
ENSG00000008735	MAPK8IP2	198.4	76	1.32341	1.04558e-05	0.000659999
ENSG00000106780	MEGF9	205.6	85.2	1.20949	1.07332e-05	0.000669434
ENSG00000113319	RASGRF2	557.6	249	1.11712	1.18672e-05	0.000722225
ENSG00000188290	HES4	125	44.2	1.39834	1.38255e-05	0.000823708
ENSG00000142149	HUNK	1327.2	618.8	1.05054	1.44262e-05	0.000853507
ENSG00000233718	MYCNOS	2445	880.2	1.39492	1.50748e-05	0.000879486
ENSG00000185215	TNFAIP2	3888	1541	1.25554	1.51243e-05	0.000879486
ENSG00000096433	ITPR3	555.6	183	1.51451	1.54277e-05	0.000891026
ENSG00000168394	TAP1	1254	452.2	1.4486	1.66462e-05	0.000945327
ENSG00000186854	TRABD2A	496.8	201.2	1.23456	1.71182e-05	0.000959297
ENSG00000186854	LOC105374836	496.8	201.2	1.23456	1.71182e-05	0.000959297
ENSG00000115138	POMC	53.8	12.8	1.9539	1.74092e-05	0.000972393
ENSG00000164683	HEY1	588.4	213.8	1.37079	1.90355e-05	0.00104757
ENSG00000156587	UBE2L6	407.4	155	1.30503	1.91059e-05	0.00104757
ENSG00000166165	CKB	249.8	73.2	1.6505	1.97635e-05	0.00107195
ENSG00000079385	CEACAM1	227	69.4	1.63699	1.98376e-05	0.00107195
ENSG00000174945	AMZ1	482.6	191.2	1.27277	1.99491e-05	0.00107195
ENSG00000236304	LOC107984360	140.2	52.2	1.35869	2.00646e-05	0.00107476
ENSG00000105426	PTPRS	139.2	44.8	1.53129	2.03175e-05	0.00108148
ENSG00000186352	ANKRD37	206.4	55	1.79079	2.1324e-05	0.00112798
ENSG00000126882	FAM78A	1444.6	595	1.23844	2.19698e-05	0.00115495
ENSG00000167971	CASKIN1	47	8.2	2.40292	2.23963e-05	0.00116653
ENSG00000184305	CCSER1	79	34.6	1.13224	2.25688e-05	0.00117132
ENSG00000067842	ATP2B3	79.8	21.6	1.81181	2.26703e-05	0.00117132
ENSG00000138028	CGREF1	41.8	9.4	2.02538	2.39212e-05	0.00121977
ENSG00000159110	IFNAR2	274	125.2	1.05091	2.58212e-05	0.00128576
ENSG00000187688	TRPV2	259.4	116.2	1.05108	2.5988e-05	0.00129028
ENSG00000184984	CHRM5	306.6	116.2	1.36128	2.78704e-05	0.0013638
ENSG00000105641	SLC5A5	23.4	3.2	2.82873	2.93902e-05	0.00142098
ENSG00000140931	CMTM3	1232.8	533.8	1.13291	2.95709e-05	0.00142098
ENSG00000205293	LINC01602	46.8	10	2.17484	2.98876e-05	0.00142098
ENSG00000108932	SLC16A6	159.6	42	1.87655	3.18462e-05	0.00148966
ENSG00000166949	SMAD3	622.2	277.4	1.05477	3.33074e-05	0.00153244
ENSG00000063015	SEZ6	26.8	5	2.35669	3.61046e-05	0.00163047
ENSG00000115165	CYTIP	61.4	17	1.76968	3.96871e-05	0.00175036
ENSG00000002587	HS3ST1	273.8	96.6	1.4621	4.0708e-05	0.0017861
ENSG00000207652	MIR621	253.2	111	1.11569	4.29622e-05	0.00186096
ENSG00000168234	TTC39C	79	35.6	1.05832	4.6147e-05	0.00195442
ENSG00000171680	PLEKHG5	700.4	295.8	1.16091	4.72185e-05	0.00198951
ENSG00000116761	CTH	87.2	32	1.36753	4.74482e-05	0.00199086
ENSG00000217801	LOC100288175	41.6	6.2	2.63252	4.85315e-05	0.00202971
ENSG00000118514	ALDH8A1	19.8	5.2	1.86761	4.889e-05	0.00203969
ENSG00000169891	REPS2	216	103.8	1.00323	5.18539e-05	0.00212134
ENSG00000176170	SPHK1	111.8	50.8	1.0277	5.48022e-05	0.00219467
ENSG00000033867	SLC4A7	859.6	404.6	1.0417	5.66007e-05	0.00225077
ENSG00000073008	PVR	1024.6	475.8	1.02639	5.75523e-05	0.00227688
ENSG00000107201	DDX58	519.8	235	1.08031	5.77062e-05	0.00227688
ENSG00000244161	FLNB-AS1	121.8	44.2	1.3568	5.77936e-05	0.00227688
ENSG00000231826	LINC01819	254.6	115.8	1.06057	6.2211e-05	0.00241174
ENSG00000059804	SLC2A3	7778.6	3103.2	1.23748	6.51127e-05	0.00249956
ENSG00000185745	IFIT1	451	163.6	1.39793	7.07826e-05	0.00267086
ENSG00000172482	AGXT	58.2	16.6	1.72128	7.8646e-05	0.00291574
ENSG00000173262	SLC2A14	31.8	5	2.55385	7.93611e-05	0.00293584
ENSG00000198892	SHISA4	116.6	53	1.05705	8.05289e-05	0.0029597
ENSG00000196208	GREB1	193.6	88	1.04026	8.49151e-05	0.00309412
ENSG00000283526	PRRT1B	19.4	4.8	1.94287	8.52308e-05	0.00309897
ENSG00000232803	SLCO4A1-AS1	52.4	13.8	1.85174	8.77313e-05	0.0031628
ENSG00000163545	NUAK2	452	202	1.08325	9.46623e-05	0.00337682
ENSG00000160224	AIRE	86.8	2.6	4.90334	9.55521e-05	0.00340141
ENSG00000086570	FAT2	2039	761.6	1.39254	9.88337e-05	0.00348396
ENSG00000099812	MISP	166.8	14	3.45137	0.000100279	0.00351079
ENSG00000164877	MICALL2	398.6	157.6	1.22488	0.000102576	0.00357648
ENSG00000101187	SLCO4A1	2534.6	989.6	1.30271	0.000105651	0.00365457
ENSG00000145908	ZNF300	134.4	42	1.52962	0.000106595	0.00367137
ENSG00000243449	C4orf48	129	55.2	1.12429	0.000107337	0.00368199
ENSG00000179148	ALOXE3	129	35	1.72498	0.000119971	0.00400218
ENSG00000138207	RBP4	81	17.8	2.1342	0.000127718	0.0041947
ENSG00000214922	HLA-F-AS1	26.8	4.6	2.51803	0.000139037	0.00448832
ENSG00000131196	NFATC1	166.8	73.2	1.12022	0.000146843	0.00471341
ENSG00000196917	HCAR1	299.8	115.4	1.35395	0.000149077	0.00476708
ENSG00000170476	MZB1	28.4	7.8	1.77434	0.000151883	0.00482218
ENSG00000184557	SOCS3	551	195	1.37779	0.000152945	0.00484516
ENSG00000137449	CPEB2	82.8	37	1.08561	0.000163393	0.00503524
ENSG00000106436	MYL10	28.8	3.6	2.94052	0.000165373	0.00507781
ENSG00000169403	PTAFR	156.2	60	1.29486	0.000169421	0.00517005
ENSG00000012232	EXTL3	1886.6	856.2	1.08973	0.000173581	0.00526322
ENSG00000111335	OAS2	441.4	164.2	1.35455	0.000191043	0.0056882
ENSG00000229414	KCNQ1-AS1	19	5.2	1.77545	0.000192912	0.00571028
ENSG00000173578	XCR1	107	31.8	1.69657	0.000196765	0.00579042
ENSG00000187569	DPPA3	46.8	15.6	1.49222	0.000209848	0.00612237
ENSG00000167676	PLIN4	270.2	90.8	1.53383	0.000229175	0.00659559
ENSG00000138030	KHK	87	33.4	1.33095	0.000238434	0.0067816
ENSG00000115758	ODC1	771.8	342.2	1.12565	0.000242555	0.00687577
ENSG00000203783	PRR9	708.4	56.8	3.69353	0.000243495	0.00689091
ENSG00000010278	CD9	1120.6	498	1.04826	0.000246477	0.0069406
ENSG00000180720	CHRM4	14.8	3.2	2.12254	0.000249939	0.00700324
ENSG00000165272	AQP3	1570.4	323.8	2.14739	0.000261812	0.00727812
ENSG00000227877	MRLN	54.4	13.2	1.99002	0.000262321	0.00727812
ENSG00000084710	EFR3B	71.2	31.2	1.1017	0.000282712	0.00776772
ENSG00000166750	SLFN5	265.8	101.4	1.34032	0.000328208	0.00868064
ENSG00000173762	CD7	104.4	33.4	1.51182	0.000351299	0.00907924
ENSG00000085741	WNT11	101	46.2	1.02729	0.000367046	0.00942881
ENSG00000169026	SLC49A3	249.8	112.4	1.07863	0.000369302	0.00947242
ENSG00000177181	RIMKLA	69.8	30.6	1.10516	0.000373506	0.00951973
ENSG00000101447	FAM83D	2872.6	1020	1.38957	0.000379013	0.00959112
ENSG00000105717	PBX4	26	8.2	1.59589	0.000388715	0.00976052
ENSG00000250508	LINC02701	40	14.2	1.40915	0.000429487	0.0104181
ENSG00000112139	MDGA1	105.2	49.2	1.02636	0.00043792	0.0105473
ENSG00000157514	TSC22D3	543	241	1.05784	0.000439482	0.01057
ENSG00000131914	LIN28A	28	3.2	3.05163	0.000448621	0.0107214
ENSG00000142102	PGGHG	365.6	163.4	1.08806	0.000482834	0.0112155
ENSG00000123612	ACVR1C	17.8	4.2	2.01508	0.000506386	0.0116643
ENSG00000110446	SLC15A3	342.8	122.6	1.40303	0.000528842	0.0119626
ENSG00000181751	C5orf30	1041	457.4	1.12102	0.000548376	0.0122191
ENSG00000164220	F2RL2	45.8	15.2	1.50921	0.000577385	0.0126178
ENSG00000067057	PFKP	2409.6	1067.8	1.06698	0.000595691	0.0129016
ENSG00000012124	CD22	20	3.8	2.2726	0.000597736	0.0129129
ENSG00000123358	NR4A1	537.8	248.8	1.00652	0.00061497	0.0131846
ENSG00000187581	COX8C	51	16.6	1.52318	0.000634555	0.0134929
ENSG00000176438	SYNE3	492.8	232.2	1.02331	0.000641816	0.0135717
ENSG00000170255	MRGPRX1	43.6	13.6	1.62241	0.000679206	0.0141335
ENSG00000184979	USP18	124.4	56.6	1.06252	0.000713191	0.014578
ENSG00000161653	NAGS	51.6	20.4	1.24858	0.000715228	0.014578
ENSG00000099822	HCN2	35.8	12.4	1.40545	0.000715362	0.014578
ENSG00000165434	PGM2L1	65.6	30	1.06545	0.000789772	0.0155365
ENSG00000180113	TDRD6	13.6	3	2.10222	0.000835847	0.0161327
ENSG00000185507	IRF7	350.2	157.6	1.0659	0.000837226	0.0161327
ENSG00000170537	TMC7	43.4	17.6	1.20819	0.000843995	0.0161816
ENSG00000160808	MYL3	64	24.2	1.32181	0.000866932	0.0165123
ENSG00000133477	FAM83F	528.2	136.2	1.92099	0.000886747	0.0166929
ENSG00000168539	CHRM1	15.8	1.4	3.50414	0.000906142	0.0169963
ENSG00000254726	MEX3A	79	37	1.03798	0.000916316	0.0171167
ENSG00000133816	MICAL2	824.8	369.8	1.11909	0.000923648	0.0171969
ENSG00000133816	MICALCL	824.8	369.8	1.11909	0.000923648	0.0171969
ENSG00000105251	SHD	22	5.8	1.86025	0.000934892	0.0172952
ENSG00000140986	RPL3L	16.8	2.6	2.62136	0.000938098	0.0172952
ENSG00000183484	GPR132	61.2	20.4	1.51468	0.000969788	0.0176326
ENSG00000133216	EPHB2	334.6	116.4	1.45556	0.000983941	0.0178053
ENSG00000215788	TNFRSF25	177	76.4	1.10892	0.00101137	0.0181151
ENSG00000124134	KCNS1	14.8	4	1.81099	0.00102763	0.0182714
ENSG00000144230	GPR17	48.4	17	1.41189	0.00106912	0.0187098
ENSG00000146070	PLA2G7	140.4	38.2	1.75732	0.00113877	0.019591
ENSG00000121966	CXCR4	244.4	40	2.51875	0.00117481	0.0200084
ENSG00000168453	HR	216.6	86.8	1.17779	0.00119213	0.0202332
ENSG00000157601	MX1	616.2	230	1.33989	0.00119366	0.0202332
ENSG00000205426	KRT81	34.8	8	2.0679	0.0012249	0.0205929
ENSG00000160161	CILP2	33.2	7	2.19429	0.00125241	0.0209516
ENSG00000106689	LHX2	92.8	36.8	1.24537	0.00125498	0.0209597
ENSG00000177335	C8orf31	311.8	144.8	1.06963	0.00127893	0.0212191
ENSG00000132688	NES	485.4	232.6	1.00149	0.00129458	0.0214458
ENSG00000175766	EIF4E1B	19.2	2.2	3.05945	0.00130423	0.0215426
ENSG00000180176	TH	35.6	16	1.05387	0.00138513	0.0225146
ENSG00000118849	RARRES1	81	36	1.07141	0.00139395	0.0225637
ENSG00000153294	ADGRF4	142	62.4	1.09649	0.00143296	0.0229978
ENSG00000180318	ALX1	12.8	3.6	1.75165	0.00144677	0.0231071
ENSG00000149294	NCAM1	111.4	9.8	3.43799	0.00144694	0.0231071
ENSG00000115155	OTOF	53.6	20.2	1.35587	0.00147283	0.0232519
ENSG00000206073	SERPINB4	15.6	3.2	2.20262	0.00153103	0.0237349
ENSG00000137642	SORL1	198.6	62.8	1.55295	0.00160322	0.0244588
ENSG00000173432	SAA1	29.8	11.4	1.30639	0.00164541	0.0249011
ENSG00000090339	ICAM1	55.4	24.8	1.04135	0.00165419	0.0249895
ENSG00000139610	CELA1	29.8	11.2	1.32552	0.00165764	0.0250193
ENSG00000135114	OASL	37.4	6	2.57574	0.00174863	0.0259998
ENSG00000171611	PTCRA	18.8	5.2	1.77198	0.00181432	0.0266024
ENSG00000167634	NLRP7	36.4	13.8	1.30501	0.00194647	0.0279384
ENSG00000232810	TNF	11.8	1.8	2.60547	0.00199868	0.0283996
ENSG00000184058	TBX1	23.6	5.8	1.88569	0.00201763	0.0285495
ENSG00000132530	XAF1	72.4	24.8	1.4431	0.00202376	0.0286032
ENSG00000132965	ALOX5AP	66	14.8	2.00973	0.00206696	0.0289745
ENSG00000087237	CETP	38.2	14.6	1.30634	0.00206919	0.0289745
ENSG00000068615	REEP1	399.8	179.4	1.11096	0.0021036	0.029302
ENSG00000124602	UNC5CL	138.2	54.2	1.2349	0.00213249	0.0296072
ENSG00000099860	GADD45B	199.2	86.2	1.07548	0.00218186	0.030047
ENSG00000040608	RTN4R	96.4	35.8	1.40903	0.00219773	0.0301922
ENSG00000144452	ABCA12	454.4	197.8	1.10576	0.00220665	0.0302169
ENSG00000153233	PTPRR	89.6	23	1.79638	0.00221283	0.030277
ENSG00000160963	COL26A1	43.2	13	1.69947	0.00224017	0.0304681
ENSG00000167916	KRT24	39	18	1.04283	0.00228686	0.0308426
ENSG00000185792	NLRP9	16.4	5	1.66792	0.00232923	0.0311666
ENSG00000197696	NMB	78	34.6	1.09333	0.00234296	0.0312787
ENSG00000069482	GAL	38	10.2	1.84179	0.0023817	0.0316194
ENSG00000162551	ALPL	5144.6	1780	1.50001	0.00242876	0.0320625
ENSG00000228741	SPATA13	13.4	2.2	2.48932	0.0024857	0.0325626
ENSG00000136244	IL6	11.8	3	1.84997	0.00254096	0.033087
ENSG00000186642	PDE2A	18.4	4.6	1.8734	0.00267488	0.034253
ENSG00000172379	ARNT2	406.4	163	1.1967	0.00290697	0.0364552
ENSG00000197355	UAP1L1	223.2	93.6	1.11578	0.00291916	0.0365541
ENSG00000119698	PPP4R4	24.8	8.4	1.45803	0.0030939	0.038254
ENSG00000099625	CBARP	33.4	11	1.493	0.00310746	0.0382908
ENSG00000166396	SERPINB7	519.2	240	1.03991	0.00320205	0.0390315
ENSG00000105649	RAB3A	30.4	13.4	1.07614	0.00325365	0.0394108
ENSG00000128591	FLNC	1346.6	558	1.16704	0.003255	0.0394108
ENSG00000169258	GPRIN1	74.4	23.2	1.63593	0.00331624	0.0398512
ENSG00000214872	SMTNL1	13.8	3.4	2.00408	0.00343449	0.041011
ENSG00000104998	IL27RA	39.2	16	1.16733	0.00345114	0.041152
ENSG00000205358	MT1H	172	76.2	1.04512	0.00353454	0.0418817
ENSG00000185090	MANEAL	43.2	19	1.14755	0.00358349	0.0423187
ENSG00000089127	OAS1	234.6	106.2	1.07031	0.00366913	0.0430857
ENSG00000167656	LY6D	165.6	76.8	1.02303	0.00376096	0.0437095
ENSG00000088836	SLC4A11	20.6	7	1.46111	0.00401647	0.0455576
ENSG00000183486	MX2	109	44	1.1982	0.00405857	0.0458024
ENSG00000101280	ANGPT4	3770.4	1311	1.46669	0.00425735	0.0472425
ENSG00000110887	DAO	22.8	5.2	2.07674	0.00439399	0.0483225
ENSG00000135324	MRAP2	18.4	5.2	1.68953	0.00453143	0.0493545
ENSG00000245694	CRNDE	14.2	67.4	-2.34115	6.95154e-15	2.08035e-11
ENSG00000245694	LOC101927480	14.2	67.4	-2.34115	6.95154e-15	2.08035e-11
ENSG00000075340	ADD2	24	86.6	-1.96041	3.02249e-10	1.83292e-07
ENSG00000188522	FAM83G	522.4	202.2	1.29965	4.47574e-10	2.53327e-07
ENSG00000162692	VCAM1	220.4	417.4	-1.02222	3.32476e-09	1.17613e-06
ENSG00000188984	AADACL3	180.4	60.4	1.49897	3.56796e-09	1.21283e-06
ENSG00000181744	DIPK2A	318.4	610.8	-1.02894	3.78222e-09	1.21538e-06
ENSG00000138131	LOXL4	19.8	102	-2.50247	1.19416e-08	3.07224e-06
ENSG00000155886	SLC24A2	10.6	32.6	-1.70922	3.95166e-08	8.60246e-06
ENSG00000147655	RSPO2	88.6	217.6	-1.4152	4.01104e-08	8.6212e-06
ENSG00000187714	SLC18A3	52.8	203	-2.02345	5.49095e-08	1.10996e-05
ENSG00000022267	FHL1	63.6	197	-1.73416	9.04213e-08	1.70595e-05
ENSG00000262655	SPON1	505.2	1179	-1.33111	1.12165e-07	1.96346e-05
ENSG00000166482	MFAP4	455.6	1115.8	-1.41572	1.1959e-07	2.06425e-05
ENSG00000213462	ERV3-1	1100.2	3684.8	-1.85607	1.23037e-07	2.06849e-05
ENSG00000136859	ANGPTL2	137.4	374.4	-1.56485	2.00901e-07	2.91564e-05
ENSG00000108821	COL1A1	25267.2	92545.2	-2.01369	2.52316e-07	3.49838e-05
ENSG00000131089	ARHGEF9	54.8	127	-1.29853	2.86907e-07	3.86642e-05
ENSG00000133800	LYVE1	110.2	362	-1.86042	3.34743e-07	4.33889e-05
ENSG00000171812	COL8A2	113	290	-1.47336	5.55049e-07	6.87937e-05
ENSG00000175040	CHST2	264.8	509.4	-1.05301	7.97234e-07	9.20886e-05
ENSG00000197594	ENPP1	451.8	889.8	-1.08739	8.9372e-07	0.000101169
ENSG00000166801	FAM111A	83.6	170.8	-1.13007	9.24487e-07	0.000102539
ENSG00000184349	EFNA5	74.2	156.8	-1.18519	1.21008e-06	0.000127622
ENSG00000172403	SYNPO2	33.2	164.6	-2.42721	1.38123e-06	0.000141285
ENSG00000013297	CLDN11	24.4	70.8	-1.64048	1.56216e-06	0.000153326
ENSG00000070748	CHAT	50	169	-1.8506	1.58644e-06	0.00015393
ENSG00000154736	ADAMTS5	149	352.2	-1.3544	1.65402e-06	0.000156029
ENSG00000153707	PTPRD	114.8	222.8	-1.04277	1.89296e-06	0.000172809
ENSG00000101230	ISM1	125.4	330.6	-1.49133	2.28644e-06	0.000197075
ENSG00000163106	HPGDS	5	37.2	-3.0696	4.25511e-06	0.000329916
ENSG00000158270	COLEC12	1129.6	2245	-1.09572	4.39777e-06	0.000337892
ENSG00000118526	TCF21	55	107.8	-1.07435	5.16619e-06	0.000381505
ENSG00000164692	COL1A2	12052.2	50871	-2.22206	5.16762e-06	0.000381505
ENSG00000129244	ATP1B2	21.2	59.2	-1.60584	5.24497e-06	0.000383877
ENSG00000262461	SPDYE17	0.2	12.2	-5.62578	6.234e-06	0.000444762
ENSG00000189058	APOD	12	72	-2.72777	6.56357e-06	0.000462446
ENSG00000177675	CD163L1	3.8	25.4	-2.90511	6.73247e-06	0.000472385
ENSG00000145147	SLIT2	290.4	595.2	-1.13269	7.76529e-06	0.000533825
ENSG00000174807	CD248	473	910.8	-1.06498	8.1544e-06	0.000549451
ENSG00000227051	C14orf132	20.6	65.6	-1.7908	8.35447e-06	0.000556309
ENSG00000161509	GRIN2C	4.2	22.4	-2.53837	9.68296e-06	0.000632372
ENSG00000237125	HAND2-AS1	105.6	243	-1.31734	9.98561e-06	0.000642256
ENSG00000221878	PSG7	278.2	899.4	-1.79957	1.07039e-05	0.000669434
ENSG00000274012	RN7SL2	206.2	504	-1.39202	1.21971e-05	0.000735329
ENSG00000149972	CNTN5	23.6	57.8	-1.37789	1.22664e-05	0.000735984
ENSG00000255399	TBX5-AS1	32.8	72	-1.2072	1.4232e-05	0.000844963
ENSG00000111962	UST	23	55.4	-1.37568	1.48226e-05	0.00086789
ENSG00000171724	VAT1L	41.2	105.8	-1.45951	1.61379e-05	0.000923191
ENSG00000004776	HSPB6	29	118.6	-2.17555	1.67556e-05	0.00094816
ENSG00000136999	CCN3	1.4	13.8	-3.44706	2.01942e-05	0.0010783
ENSG00000181072	CHRM2	11	35.8	-1.79278	2.26952e-05	0.00117132
ENSG00000090006	LTBP4	441.2	874.8	-1.10205	2.36856e-05	0.00121139
ENSG00000170498	KISS1	59649.6	158617	-1.53675	2.67796e-05	0.00132571
ENSG00000105989	WNT2	443.6	848	-1.03215	2.70632e-05	0.00133585
ENSG00000101096	NFATC2	36.8	104.2	-1.6352	2.786e-05	0.0013638
ENSG00000224307	LOC101929331	1.2	12.6	-3.52029	2.95751e-05	0.00142098
ENSG00000143195	ILDR2	32.8	90.8	-1.59312	2.97028e-05	0.00142098
ENSG00000205363	INSYN1	2.8	14.6	-2.49364	2.99445e-05	0.00142098
ENSG00000163431	LMOD1	33.6	97	-1.66296	3.00215e-05	0.00142098
ENSG00000072195	SPEG	100.8	232.4	-1.32459	3.07329e-05	0.00144555
ENSG00000091128	LAMB4	23.8	65.2	-1.56177	3.24547e-05	0.00150981
ENSG00000145730	PAM	1906	3601.2	-1.04396	3.33923e-05	0.00153244
ENSG00000116774	OLFML3	304.6	658.8	-1.23631	3.37252e-05	0.00154326
ENSG00000165457	FOLR2	1	36.8	-5.38601	3.381e-05	0.00154326
ENSG00000172264	MACROD2	9.2	26	-1.58972	3.59651e-05	0.0016285
ENSG00000010610	CD4	64.2	156.2	-1.40983	3.72782e-05	0.00166575
ENSG00000204941	PSG5	19649	39347.4	-1.125	4.25536e-05	0.00185748
ENSG00000168542	COL3A1	46057.6	107315	-1.35499	4.36312e-05	0.00188514
ENSG00000177628	GBA	1517.6	3320.6	-1.26296	4.45047e-05	0.00191314
ENSG00000185559	DLK1	4635.6	9017	-1.09077	4.66613e-05	0.00197092
ENSG00000237172	B3GNT9	45.8	95.4	-1.1835	4.74853e-05	0.00199086
ENSG00000012171	SEMA3B	8029.6	21339.8	-1.53947	4.92701e-05	0.00205051
ENSG00000114473	IQCG	39.8	318.8	-3.05038	5.16503e-05	0.00211841
ENSG00000248809	LINC01095	43.8	144	-1.81866	5.26791e-05	0.00213847
ENSG00000071967	CYBRD1	116	240.8	-1.18104	5.3357e-05	0.00215715
ENSG00000173930	SLCO4C1	6.8	32	-2.36572	5.82936e-05	0.0022807
ENSG00000140092	FBLN5	144.4	320.2	-1.28536	6.45099e-05	0.0024895
ENSG00000230148	HOXB-AS1	37	75.4	-1.13381	6.52124e-05	0.00249956
ENSG00000171659	GPR34	2.4	26.4	-3.64209	6.61586e-05	0.00253012
ENSG00000137809	ITGA11	29.8	118	-2.15584	6.70437e-05	0.00255247
ENSG00000151136	BTBD11	22.8	48.8	-1.18852	7.82289e-05	0.00291268
ENSG00000143416	SELENBP1	138.4	322.2	-1.35434	8.19427e-05	0.00299868
ENSG00000042062	RIPOR3	20.6	88	-2.25563	9.07739e-05	0.00326555
ENSG00000155629	PIK3AP1	266.4	603.4	-1.31522	9.81498e-05	0.00347375
ENSG00000011465	DCN	2715.6	6525.2	-1.40171	9.81978e-05	0.00347375
ENSG00000107984	DKK1	134.4	352.2	-1.51796	9.93528e-05	0.00349277
ENSG00000131094	C1QL1	3.2	17.8	-2.62367	0.000103627	0.00360572
ENSG00000245532	NEAT1	9270.2	17845	-1.0549	0.000105677	0.00365457
ENSG00000179869	ABCA13	1.8	15.2	-3.15296	0.000107877	0.00368562
ENSG00000184988	TMEM106A	364	693	-1.05522	0.000113322	0.00386386
ENSG00000114670	NEK11	23.6	49.6	-1.15587	0.000113841	0.00387378
ENSG00000140450	ARRDC4	82.6	163	-1.09594	0.00011421	0.00387858
ENSG00000263293	THCAT158	8.4	26.6	-1.78154	0.000114728	0.00388837
ENSG00000130176	CNN1	32.2	115.2	-1.9946	0.000116104	0.00392717
ENSG00000177738	LOC648987	39	72.8	-1.00842	0.000118879	0.00398927
ENSG00000154153	RETREG1	51.4	113	-1.2485	0.000119128	0.00398975
ENSG00000049089	COL9A2	27.8	62	-1.28844	0.000119846	0.00400218
ENSG00000152926	ZNF117	1391.6	2925	-1.1652	0.00012081	0.00402227
ENSG00000152926	ERV3-1-ZNF117	1391.6	2925	-1.1652	0.00012081	0.00402227
ENSG00000163017	ACTG2	230.2	632.8	-1.59336	0.000122964	0.00407798
ENSG00000150471	ADGRL3	356	693.4	-1.06835	0.000124087	0.00410721
ENSG00000204614	TRIM40	234.6	463	-1.09238	0.000126238	0.0041541
ENSG00000166033	HTRA1	5592	12924.8	-1.31127	0.000129144	0.00423334
ENSG00000204148	LINC00474	6.4	30	-2.37913	0.000136324	0.0044234
ENSG00000106541	AGR2	13.4	60	-2.31511	0.000141859	0.00457072
ENSG00000047597	XK	5.6	39	-2.9772	0.000150058	0.00478943
ENSG00000066629	EML1	111.8	236.2	-1.21064	0.000158436	0.00496354
ENSG00000183508	TENT5C	47.8	143.6	-1.74207	0.000159333	0.00497331
ENSG00000008441	NFIX	81.4	150.6	-1.01483	0.00016287	0.00503524
ENSG00000121440	PDZRN3	107	198.8	-1.01172	0.000162912	0.00503524
ENSG00000234390	USP27X-AS1	46.2	96.6	-1.17075	0.000169595	0.00517005
ENSG00000251562	MALAT1	2332.8	4882.4	-1.18827	0.000170726	0.00518591
ENSG00000153246	PLA2R1	93.2	203.2	-1.25739	0.0001922	0.00570552
ENSG00000159714	ZDHHC1	100.6	206.8	-1.14251	0.000194959	0.00574722
ENSG00000173376	NDNF	36.4	75.4	-1.16549	0.000198494	0.0058312
ENSG00000204291	COL15A1	1300.6	2670.8	-1.16354	0.000219074	0.00638058
ENSG00000115648	MLPH	198.2	398.8	-1.15367	0.000222265	0.00642941
ENSG00000187955	COL14A1	2186.2	4035.2	-1.0079	0.000223896	0.00646558
ENSG00000197943	PLCG2	139.4	295.6	-1.20256	0.000235305	0.00672641
ENSG00000105246	EBI3	9421	23477.2	-1.45229	0.000240901	0.0068403
ENSG00000168477	TNXB	56.2	151	-1.57041	0.000244182	0.00689884
ENSG00000163554	SPTA1	24.4	222.8	-3.34924	0.000262287	0.00727812
ENSG00000124839	RAB17	417.8	929.8	-1.27302	0.000286031	0.00781665
ENSG00000107821	KAZALD1	43.6	98.8	-1.30597	0.000286334	0.00781665
ENSG00000143320	CRABP2	139	286.6	-1.18524	0.000306976	0.00823451
ENSG00000150594	ADRA2A	7.6	27	-1.95593	0.000310019	0.00830303
ENSG00000111181	SLC6A12	10.6	27.2	-1.48937	0.000324722	0.00860183
ENSG00000129595	EPB41L4A	15.4	48.6	-1.79749	0.00033588	0.00882907
ENSG00000164176	EDIL3	78.6	171.4	-1.23275	0.000338033	0.00884407
ENSG00000253368	TRNP1	7.8	23.6	-1.72599	0.000347997	0.00902136
ENSG00000127951	FGL2	48.2	134.6	-1.6137	0.000359705	0.00925424
ENSG00000107242	PIP5K1B	83	160.6	-1.06908	0.000371729	0.00950597
ENSG00000162407	PLPP3	1205.4	2283	-1.02931	0.000373899	0.00951973
ENSG00000168356	SCN11A	11.6	32.8	-1.62458	0.000377165	0.00955861
ENSG00000130377	ACSBG2	24.4	69.4	-1.62593	0.000390299	0.00977475
ENSG00000234028	EIF2AK3-DT	16.6	33.8	-1.12962	0.000393008	0.00981312
ENSG00000106688	SLC1A1	18	69.8	-2.10996	0.000394699	0.00981312
ENSG00000260314	MRC1	45.4	197.4	-2.29144	0.00039775	0.00985955
ENSG00000165966	PDZRN4	20.4	49.8	-1.37204	0.000425238	0.0103471
ENSG00000178852	EFCAB13	14.8	43.6	-1.68842	0.000425951	0.0103471
ENSG00000196189	SEMA4A	57.6	129	-1.29903	0.000443501	0.0106515
ENSG00000119681	LTBP2	200.4	467.2	-1.32069	0.000452389	0.0107585
ENSG00000249715	FER1L5	164.2	316	-1.05473	0.000459757	0.0108693
ENSG00000174348	PODN	29	98.8	-1.89252	0.000460247	0.0108693
ENSG00000060718	COL11A1	44	109.8	-1.45655	0.000462005	0.0108805
ENSG00000179909	ZNF154	24.2	45	-1.00643	0.000478797	0.0111522
ENSG00000107796	ACTA2	458	870.8	-1.05678	0.000484864	0.0112472
ENSG00000129009	ISLR	98.2	219.6	-1.28838	0.000507652	0.0116643
ENSG00000173114	LRRN3	72.8	159.6	-1.23297	0.000513859	0.0117665
ENSG00000147606	SLC26A7	47	270.6	-2.67264	0.000516772	0.0118099
ENSG00000177706	FAM20C	34	74.2	-1.25781	0.000535235	0.0120694
ENSG00000166448	TMEM130	3	19.6	-2.86472	0.00053729	0.0120997
ENSG00000145362	ANK2	30.2	70.8	-1.32239	0.000539124	0.0121249
ENSG00000135838	NPL	149.2	327.6	-1.25823	0.000543099	0.012178
ENSG00000134986	NREP	160.8	340	-1.21683	0.000555457	0.0122648
ENSG00000177875	CCDC184	37	77	-1.18278	0.000560138	0.0123441
ENSG00000072182	ASIC4	5.4	36.6	-2.92454	0.000584512	0.0127081
ENSG00000087116	ADAMTS2	47	145	-1.778	0.000611889	0.013137
ENSG00000154493	C10orf90	123.4	237.8	-1.06443	0.000617878	0.0132302
ENSG00000144130	NT5DC4	14.6	63.2	-2.26579	0.000634913	0.0134929
ENSG00000138109	CYP2C9	26	69.4	-1.53756	0.000641223	0.0135717
ENSG00000182489	XKRX	59.8	116.6	-1.07687	0.000646101	0.0136283
ENSG00000154358	OBSCN	525.2	1067.4	-1.16318	0.000652737	0.0137172
ENSG00000145824	CXCL14	1067.8	2105.6	-1.13098	0.000660281	0.013825
ENSG00000065325	GLP2R	18.4	44.2	-1.32902	0.000660309	0.013825
ENSG00000175920	DOK7	3.2	12.8	-2.08503	0.000691997	0.0142945
ENSG00000136542	GALNT5	4.4	19.6	-2.2966	0.000702281	0.0144367
ENSG00000149527	PLCH2	3.2	12.6	-2.11322	0.000703491	0.0144441
ENSG00000134115	CNTN6	38.8	93.8	-1.39424	0.000744524	0.01493
ENSG00000139329	LUM	2771.6	5217.2	-1.03279	0.000745308	0.01493
ENSG00000070729	CNGB1	20.8	44.8	-1.21285	0.000753995	0.0150622
ENSG00000115041	KCNIP3	12.2	33.4	-1.59536	0.000768817	0.015215
ENSG00000005243	COPZ2	52.2	96.8	-1.00576	0.00078857	0.0155336
ENSG00000145335	SNCA	9	33.6	-2.02518	0.0008068	0.0157828
ENSG00000184347	SLIT3	28.8	91.8	-1.82212	0.000809709	0.0158033
ENSG00000100427	MLC1	39.2	90.4	-1.35338	0.000812928	0.0158297
ENSG00000084444	FAM234B	302.2	687.8	-1.29997	0.000813933	0.0158311
ENSG00000164694	FNDC1	73	138	-1.03831	0.000816712	0.015867
ENSG00000157613	CREB3L1	273	512	-1.04138	0.000856454	0.0163952
ENSG00000164010	ERMAP	45.8	90.4	-1.10327	0.000869541	0.0165339
ENSG00000237339	LINC01502	0	100.4	-9.25072	0.000919188	0.0171514
ENSG00000196132	MYT1	2.2	16.6	-3.09395	0.00093053	0.0172682
ENSG00000182732	RGS6	4.4	17.2	-2.12263	0.00093602	0.0172952
ENSG00000182175	RGMA	19.8	41.8	-1.17743	0.000994658	0.0179102
ENSG00000249242	TMEM150C	175.8	358.6	-1.13031	0.00100684	0.0180721
ENSG00000108823	SGCA	12.6	33.2	-1.54283	0.00101264	0.0181188
ENSG00000204613	TRIM10	0.6	12.2	-4.52304	0.0010142	0.0181274
ENSG00000184792	OSBP2	64.2	168	-1.52992	0.00105174	0.0185446
ENSG00000179954	SSC5D	7.8	29.2	-2.07196	0.00107986	0.0188317
ENSG00000184194	GPR173	25.8	49.2	-1.04895	0.00108022	0.0188317
ENSG00000222004	LINC02860	275.6	534.2	-1.0736	0.00109149	0.0189699
ENSG00000103175	WFDC1	155.4	285.8	-1.02036	0.00112508	0.0194938
ENSG00000233746	LINC00656	14.8	42.8	-1.6493	0.00113183	0.0195522
ENSG00000124743	KLHL31	65	165.6	-1.48834	0.00113648	0.019591
ENSG00000103021	CCDC113	80.4	182	-1.32554	0.0012156	0.0205178
ENSG00000127928	GNGT1	117.4	217.2	-1.00326	0.00122431	0.0205929
ENSG00000169085	VXN	19	44	-1.30372	0.00123502	0.020722
ENSG00000102359	SRPX2	34	72	-1.20947	0.0013018	0.0215235
ENSG00000127585	FBXL16	54.6	202.8	-2.0402	0.0013056	0.0215429
ENSG00000114737	CISH	344.2	647.8	-1.02726	0.00134067	0.0219524
ENSG00000071282	LMCD1	121	236.6	-1.09616	0.001391	0.0225613
ENSG00000074966	TXK	17.6	40.6	-1.32159	0.00146849	0.0232519
ENSG00000241644	INMT	19.2	45	-1.35214	0.0014776	0.0232519
ENSG00000175084	DES	200	661.4	-1.8724	0.00149989	0.0234604
ENSG00000243130	PSG11	2176.4	7084	-1.806	0.00150323	0.0234604
ENSG00000166947	EPB42	5.2	70.4	-3.9258	0.00152311	0.0236836
ENSG00000099958	DERL3	568	1907.8	-1.89529	0.00153054	0.0237349
ENSG00000181804	SLC9A9	7.8	27.8	-1.99947	0.00153159	0.0237349
ENSG00000049769	PPP1R3F	36	78.4	-1.22588	0.00156714	0.0241252
ENSG00000135218	CD36	91.2	360.8	-2.13208	0.00157742	0.0241806
ENSG00000116194	ANGPTL1	16.4	56.4	-1.91937	0.00158154	0.0242151
ENSG00000178573	MAF	75.2	171.8	-1.337	0.00158359	0.0242246
ENSG00000238141	BRWD1-AS1	5	20	-2.13556	0.00160729	0.024477
ENSG00000242221	PSG2	17605.4	56375.8	-1.82452	0.00162821	0.024729
ENSG00000224081	SLC44A3-AS1	20.2	56	-1.59462	0.00163783	0.0248528
ENSG00000197766	CFD	66.2	149.2	-1.30796	0.00169236	0.0253315
ENSG00000168675	LDLRAD4	17.8	38.2	-1.21952	0.00172718	0.0257485
ENSG00000150893	FREM2	147.4	280.4	-1.02776	0.00175864	0.0261258
ENSG00000172543	CTSW	1.8	14.2	-3.16044	0.00182203	0.0266478
ENSG00000105609	LILRB5	1.8	12.2	-2.94279	0.00187339	0.0271882
ENSG00000166963	MAP1A	54.8	104	-1.05429	0.00187626	0.0271932
ENSG00000117983	MUC5B	4.6	21.8	-2.4126	0.00191896	0.0276604
ENSG00000139971	ARMH4	19.2	58.4	-1.7506	0.00194187	0.0279195
ENSG00000198515	CNGA1	11.2	41	-2.00972	0.00197714	0.0281643
ENSG00000144152	FBLN7	88.8	205.6	-1.33776	0.00198536	0.0282576
ENSG00000278921	EPB41L4A-DT	5.4	18.4	-1.91078	0.00204619	0.0288172
ENSG00000203747	FCGR3A	70	280.4	-2.15782	0.00206985	0.0289745
ENSG00000122176	FMOD	532	1054.4	-1.12312	0.00208218	0.0290513
ENSG00000130635	COL5A1	7200.2	13261.8	-1.01018	0.00211968	0.0294671
ENSG00000180891	CUEDC1	46.2	87.4	-1.05805	0.00216112	0.0298611
ENSG00000163132	MSX1	27.6	51.8	-1.01806	0.00216667	0.0299106
ENSG00000168875	SOX14	4.4	19.8	-2.32291	0.00220293	0.0302146
ENSG00000235257	ITGA9-AS1	8	18.2	-1.28532	0.00224727	0.030511
ENSG00000132561	MATN2	130.8	448.2	-1.92382	0.00228669	0.0308426
ENSG00000105664	COMP	2	13.4	-2.89775	0.00229208	0.0308886
ENSG00000100626	GALNT16	3.6	12	-1.83589	0.00230324	0.0309897
ENSG00000152894	PTPRK	266.2	503.6	-1.04593	0.00232868	0.0311666
ENSG00000171798	KNDC1	16	34.8	-1.2301	0.00235468	0.0313835
ENSG00000206177	HBM	3.2	77.2	-4.76393	0.00238098	0.0316194
ENSG00000188672	RHCE	4.2	22.4	-2.59508	0.00255227	0.0331835
ENSG00000196188	CTSE	11.2	89.4	-3.18117	0.00257208	0.0333389
ENSG00000074047	GLI2	30.6	64.4	-1.20132	0.00260003	0.033573
ENSG00000139304	PTPRQ	12.8	33.8	-1.50527	0.00261947	0.0336858
ENSG00000162367	TAL1	39.4	100.8	-1.49295	0.00267847	0.0342731
ENSG00000119147	ECRG4	20.2	58.8	-1.66036	0.00269461	0.0344019
ENSG00000275591	XKR5	5	13.8	-1.54553	0.00272772	0.0346422
ENSG00000124491	F13A1	37.4	495.8	-3.92352	0.00291774	0.0365541
ENSG00000143028	SYPL2	9.4	28.8	-1.72742	0.00297863	0.0371891
ENSG00000180155	LYNX1	26.2	66	-1.46047	0.00299838	0.0373532
ENSG00000243232	PCDHAC2	12	27.4	-1.28596	0.00300684	0.0374038
ENSG00000173068	BNC2	49.2	99.8	-1.15306	0.00307812	0.0381507
ENSG00000175356	SCUBE2	35	66.8	-1.0584	0.00309772	0.038254
ENSG00000183092	BEGAIN	13.4	26.6	-1.06045	0.00310616	0.0382908
ENSG00000256977	LIMS3	3.4	10.8	-1.76116	0.00323772	0.039313
ENSG00000254636	ARMS2	3	13.8	-2.23753	0.00325993	0.0394257
ENSG00000064309	CDON	43.6	85	-1.08527	0.00330529	0.0397538
ENSG00000136842	TMOD1	6.4	31.4	-2.47293	0.00330579	0.0397538
ENSG00000254656	RTL1	24.4	50.8	-1.17772	0.0033261	0.0399316
ENSG00000118785	SPP1	203.2	1818	-3.35108	0.00339231	0.0406216
ENSG00000048052	HDAC9	44.8	89.8	-1.11927	0.00346067	0.0411641
ENSG00000166527	CLEC4D	4.8	13.6	-1.59481	0.00348141	0.0413387
ENSG00000183111	ARHGEF37	63.6	124.2	-1.10863	0.00354274	0.0419495
ENSG00000152078	TLCD4	34.4	74	-1.23999	0.00358569	0.0423187
ENSG00000138101	DTNB	31.4	64	-1.12692	0.00364923	0.0429114
ENSG00000121270	ABCC11	4.8	16.8	-1.96156	0.00366681	0.0430857
ENSG00000198353	HOXC4	17.6	38.4	-1.2659	0.0037079	0.0434207
ENSG00000134061	CD180	3.2	17.2	-2.6071	0.00371895	0.0434901
ENSG00000233237	LINC00472	6.4	14.2	-1.25092	0.00373856	0.0435695
ENSG00000164023	SGMS2	116	239.6	-1.18257	0.00382658	0.0442611
ENSG00000169432	SCN9A	8.6	18.6	-1.21635	0.00388844	0.044655
ENSG00000172935	MRGPRF	16.4	33.8	-1.18204	0.00391332	0.0447462
ENSG00000163453	IGFBP7	47.2	115.4	-1.44961	0.0039494	0.0449771
ENSG00000073464	CLCN4	6	18.6	-1.77804	0.00402539	0.0455704
ENSG00000183307	TMEM121B	6.8	16.8	-1.41773	0.00408688	0.046018
ENSG00000168447	SCNN1B	333.8	715.8	-1.21867	0.00410058	0.0461417
ENSG00000055118	KCNH2	12	27.4	-1.32189	0.00411912	0.0463161
ENSG00000166073	GPR176	2.6	11.2	-2.22423	0.00413688	0.0463964
ENSG00000095970	TREM2	5.4	24.8	-2.38674	0.00417392	0.0467193
ENSG00000079931	MOXD1	4.2	15	-1.92026	0.00424415	0.0471552
ENSG00000231924	PSG1	43773.4	84193.6	-1.0445	0.00428313	0.0474414
ENSG00000164669	INTS4P1	6.2	17.4	-1.54377	0.00448828	0.049103
ENSG00000163975	MELTF	53	106.6	-1.1404	0.00450412	0.0492149
ENSG00000178401	DNAJC22	5.8	14.6	-1.44396	0.00451206	0.0492214
ENSG00000180340	FZD2	43.6	95	-1.27661	0.0045249	0.049315
